# Supplementary material
Source: Springer Nature journal article supplement (https://www.springermedizin.de/resource/supplementary/13075_2012_4437_MOESM5_ESM.pdf/10110406)

**A**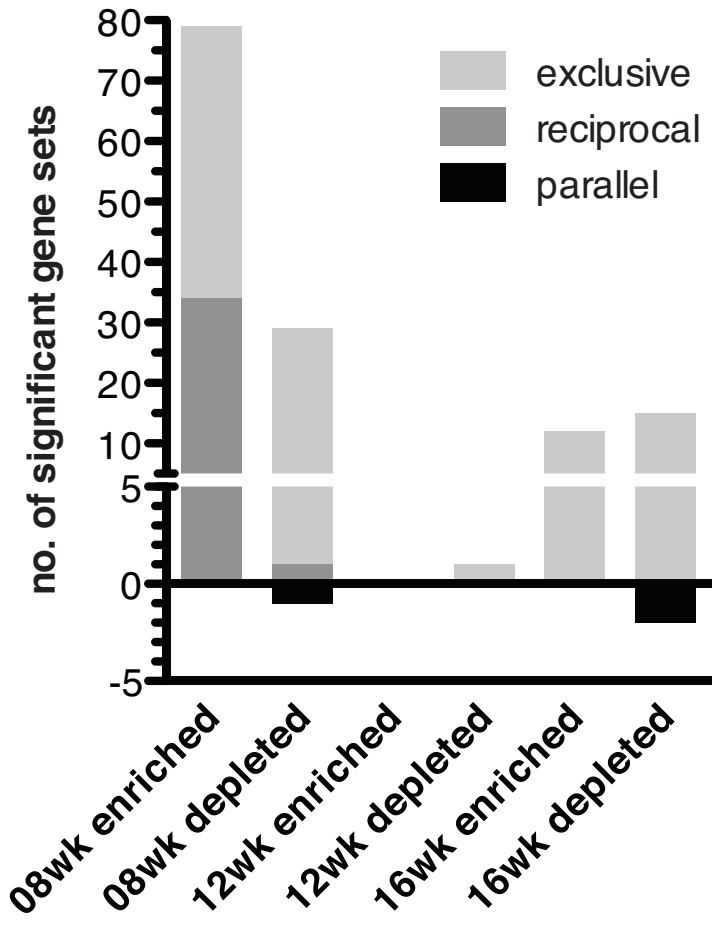**B**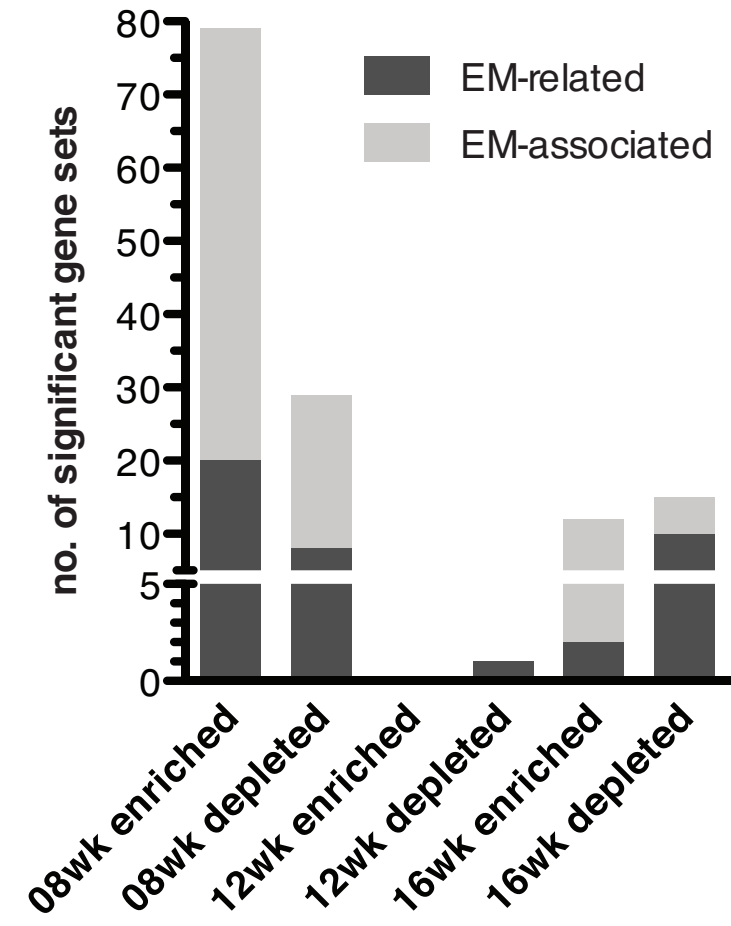**C**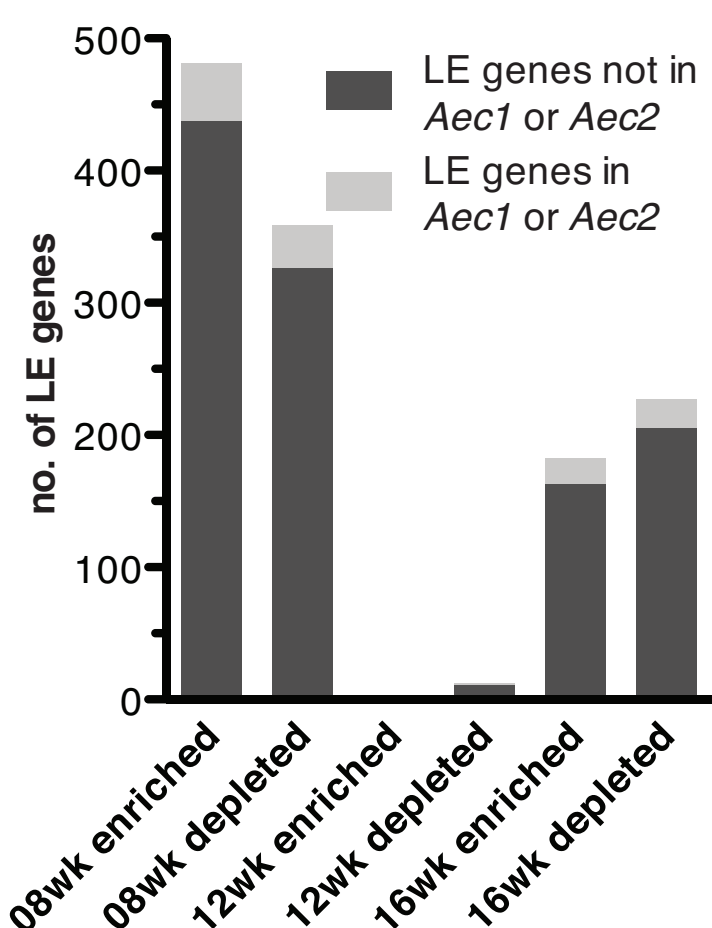**D**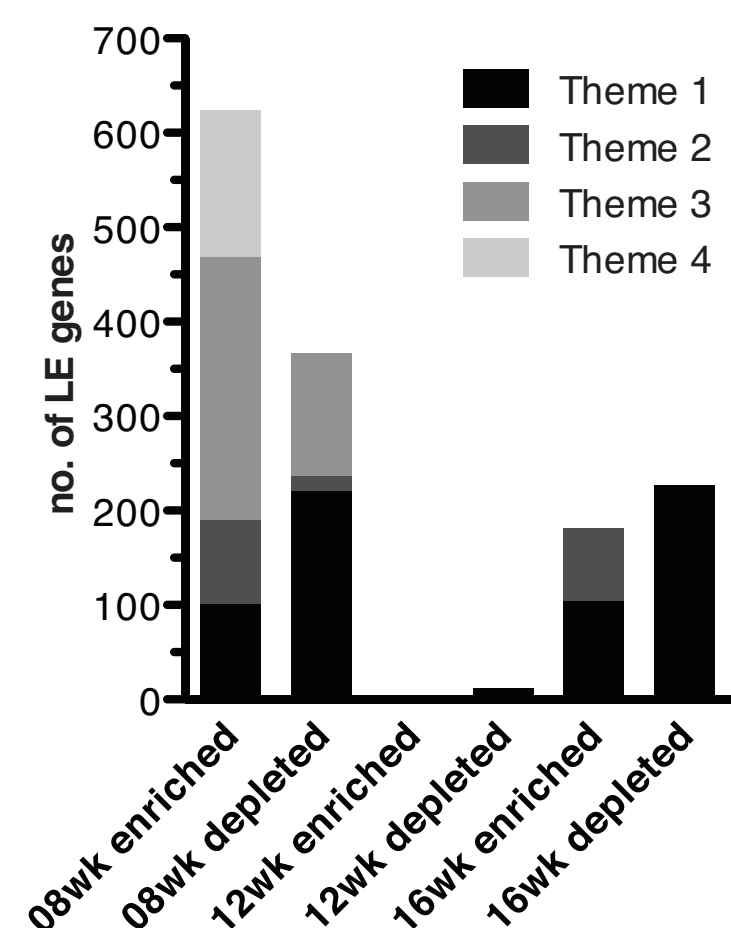

Supplement: MOESM5 [file 10110406]
